# Supplementary material for: Metastatic breast cancer and pseudocirrhosis: an unknown clinical entity
Source: PubMed Central journal article supplement — ESMO Open. 2020 Jun 1;5(3):e000695. doi: 10.1136/esmoopen-2020-000695 (PMC7265039; doi:10.1136/esmoopen-2020-000695), 2020-06-01
Supplement: esmoopen-2020-000695supp001.pdf [file esmoopen-2020-000695supp001.pdf]

## **SUPPLEMENTARY FILE**

## Supplementary File

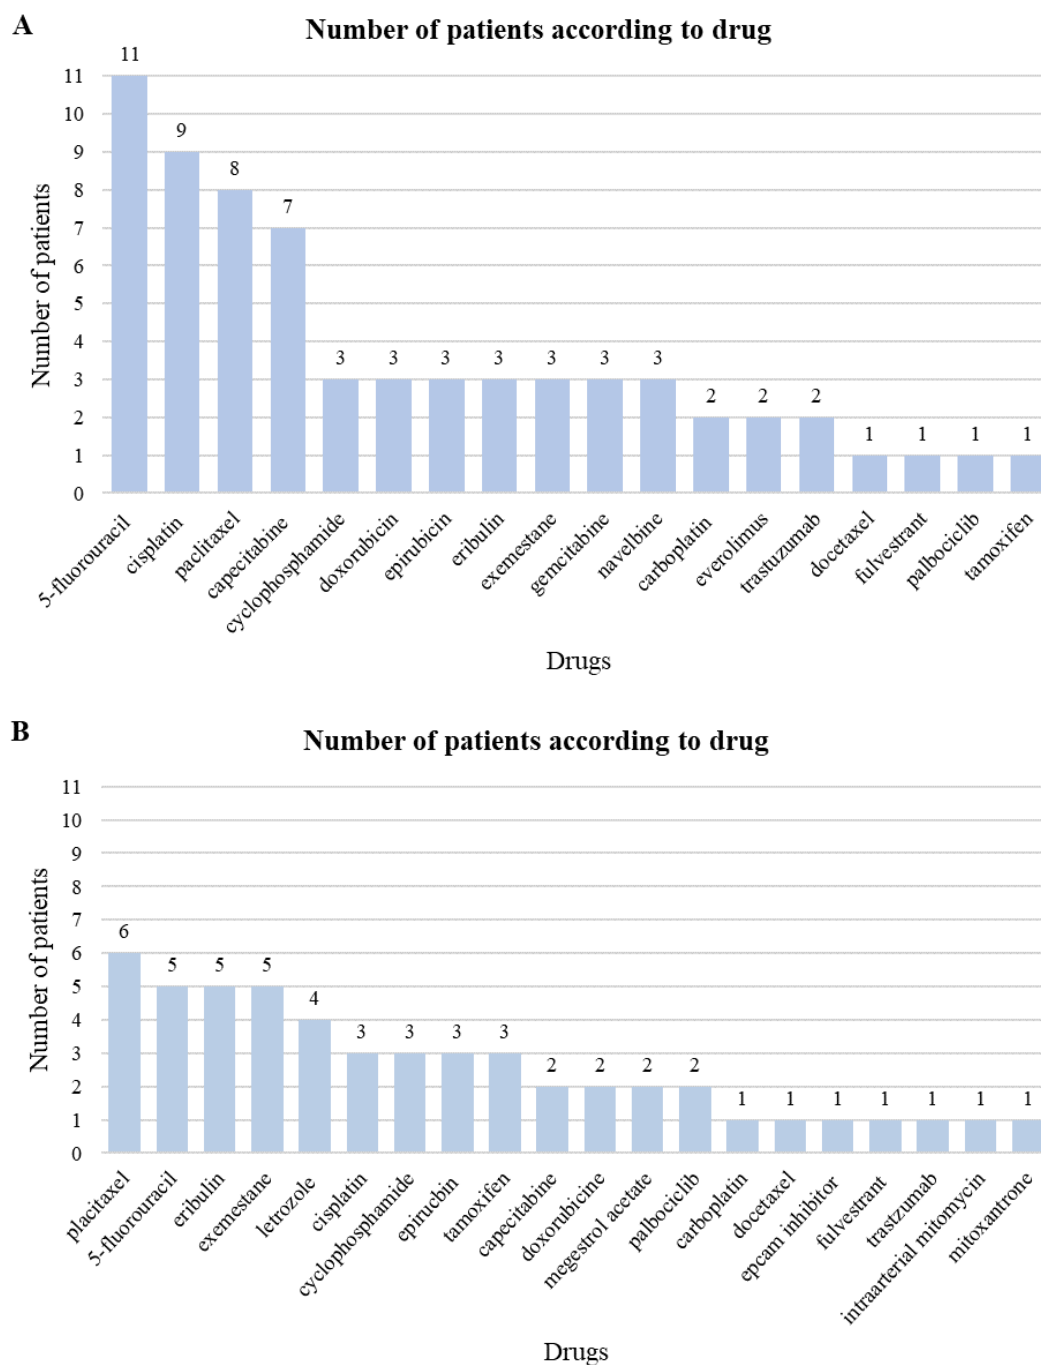

**Figure 2:** Ongoing treatment during the first description of diffuse liver contour abnormalities (A) and the previous line of treatment (B). The drugs administered in combination were dissociated for analysis.

## Supplementary File

**Table S-1: Patients reported in the literature with hepatic metastases and who developed liver contour abnormalities during chemotherapy**

| Authors          | No. of cases | Tumor                                                       | Year | Journal<br>(Abbreviation)          |
|------------------|--------------|-------------------------------------------------------------|------|------------------------------------|
| Shirkoda A. ‡    | 4            | Breast                                                      | 1994 | Abdom Imaging                      |
| Young ST.*       | 22           | Breast                                                      | 1994 | Am J Roentgenol                    |
| Chandrakar V.*   | 1            | Breast, ductal HER2+                                        | 2005 | Breast J                           |
| Qayyum A. ¶      | 16           | Breast                                                      | 2007 | Clin Imaging                       |
| Cervoni J-P.†    | 1            | Breast                                                      | 2008 | Semin Liver Dis                    |
| Gomez C. ‡       | 7            | Breast                                                      | 2008 | Clin Transl Oncol                  |
| Kang SP.*        | 1            | Pancreas                                                    | 2008 | World J Gastroenterol              |
| Shitara K.       | 1            | Breast                                                      | 2008 | Gan To Kagaku Ryoho                |
| Kobashigawa C.*  | 1            | Esophagus                                                   | 2010 | South Med J                        |
| Liu CH.*         | 1            | Breast, HER2+                                               | 2011 | J Gastroenterol Hepatol<br>Hepatol |
| Sonnenblick A.*  | 5            | Breast, ductal (4),<br>mixed (1), luminal (4),<br>HER2+ (1) | 2011 | Oncology                           |
| Harry BL.*       | 1            | Thyroid                                                     | 2012 | Curr Oncol                         |
| Deprez FC.†      | 1            | Breast                                                      | 2013 | JBR-BTR                            |
| Jeong WK.*       | 2            | Breast, ductal                                              | 2013 | Clin Mol Hepatol                   |
| Battisti S.*     | 1            | Settler                                                     | 2014 | Colorectal Cancer Clin             |
| Mizuyama Y.*     | 2            | Breast                                                      | 2014 | Gan To Kagaku Ryoho                |
| Alberti N.†      | 5            | Breast                                                      | 2015 | Diagn Interv Imaging               |
| Adike A.*        | 6            | Breast, luminal (5),<br>HER2+ (1)                           | 2016 | Gastroenterol Rep Case             |
| Kumamoto K.*     | 1            | Rectal                                                      | 2016 | Mol Clin Oncol                     |
| Mitani S.*       | 1            | Gastric                                                     | 2016 | Case Rep Uncol                     |
| Zeina AR.*       | 1            | Breast, luminal                                             | 2017 | Isr Med Assoc J                    |
| Aoyagi T.*       | 3            | Breast, ductal, luminal                                     | 2018 | Breast Cancer                      |
| Kashyap R.*      | 1            | Breast, luminal                                             | 2018 | Indian J Nucl Med                  |
| Leshchinskiy S.* | 1            | Breast                                                      | 2018 | Abdom Radiol                       |
| Geeroms B.*      | 3            | Breast, ductal (2),<br>lobular (1)                          | 2018 | J Vasc Interv Radiol               |
| Oliai C.*        | 37           | Breast                                                      | 2019 | Breast Cancer Res Treat            |

Terms used to describe the clinical presentation:

\* Pseudocirrhosis

† Hepar lobatum carcinomatosum

‡ Cirrhosis/Cirrhosis-like

¶ Diffuse nodular appearance resembling cirrhosis

| According to the abstract only, article in Japanese

## Supplementary File

**Table S-2: Terms for coded and automated text search**

|                                        |
|----------------------------------------|
| Bulge/Dented liver                     |
| Irregular liver                        |
| Dysmorphic liver                       |
| Cirrhotic liver                        |
| Liver cirrhosis                        |
| Hepatic cirrhosis                      |
| Indented liver                         |
| Liver fibrosis                         |
| Hepatic fibrosis                       |
| Hepatic fibrotic evolution             |
| Liver fibrotic evolution               |
| Evolution of fibrotic liver            |
| Liver fibrosis evolution               |
| Cirrhotic evolution after chemotherapy |
| Post-chemotherapy cirrhosis evolution  |
| Induced cirrhosis                      |
| Meta-induced cirrhosis                 |
| Portal hypertension                    |
| Hypersplenism                          |
| Breast cancer                          |
| Breast Neoplasia                       |
| Mammary tumor                          |
| Hepatic metastasis                     |
| Liver metastasis                       |
| Recurrent liver metastasis             |
| Liver metastasis recurrence            |
| Generalization to the liver            |
| Hepatic generalization                 |
| Hepatic meta                           |
| Meta liver                             |
| Liver extension                        |
| Hepatic extension                      |
| Metastatic infiltration of the liver   |
| Focal hepatic lesion                   |
| Focal liver lesion                     |
| Chemotherapy                           |
| Chemo                                  |
| Cycle                                  |
| Line                                   |
| Febrile neutropenia                    |

The results identified contained at least one item from each of the four categories. Our research was done in French using equivalent words.

## Supplementary File

| <b>Table S-3: Oncological management (N=48)</b>                           |                             |
|---------------------------------------------------------------------------|-----------------------------|
| <b>Local treatments</b>                                                   | <b>n (%) (95% CI for %)</b> |
| Neoadjuvant chemotherapy                                                  | 5 (10.4) (4.5 – 22.2)       |
| Breast conserving surgery                                                 | 22 (45.8) (32.6 – 59.7)     |
| Lymphadenectomy                                                           | 15                          |
| Sentinel node                                                             | 4                           |
| None                                                                      | 3                           |
| Mastectomy                                                                | 26 (54.2) (40.3 – 67.4)     |
| Lymphadenectomy                                                           | 21                          |
| Sentinel node                                                             | 1                           |
| None                                                                      | 3                           |
| Adjuvant radiotherapy                                                     | 37 (77.1) (63.5 – 86.7)     |
| Adjuvant chemotherapy                                                     | 16 (33.3) (21.7 – 47.5)     |
| Adjuvant hormonal therapy                                                 | 33 (68.8) (54.7 – 80.1)     |
| <b>Metastatic treatments*</b>                                             | <b>n (%) (95% CI for %)</b> |
| Hormonal therapy                                                          | 35 (72.9) (59.0 – 83.4)     |
| Tamoxifen                                                                 | 18                          |
| Aromatase inhibitors                                                      | 33                          |
| Other                                                                     | 9                           |
| Anti-metabolites                                                          | 33 (68.8) (54.7 – 80.1)     |
| Taxanes                                                                   | 30 (62.5) (48.4 – 74.8)     |
| Anthracyclines                                                            | 26 (54.2) (36.4 – 63.6)     |
| Alkylating agents                                                         | 19 (40.0) (27.0 – 53.7)     |
| Platinum based                                                            | 18 (37.5) (25.2 – 51.6)     |
| Other microtubule inhibitors                                              | 17 (35.4) (23.4 – 49.7)     |
| Targeted therapies                                                        | 9 (18.8) (10.2 – 31.9)      |
| Anti-HER2                                                                 | 5 (10.4) (4.5 – 22.2)       |
| Topoisomerase inhibitors                                                  | 1 (2.1) (0.4 – 10.9)        |
| <b>Metastatic data (N=48)</b>                                             |                             |
| Median time from primitive to first metastatic lesion - years<br>(95% CI) | 4.62<br>(3.00 – 6.10)       |
| Median time from primitive to first hepatic lesion - years<br>(95% CI)    | 6.12<br>(3.15 – 8.21)       |
| Average number of metastatic sites - average ± SD                         | 2.19 ± 1.28                 |
| <b>Metastasis site (excluding liver)</b>                                  | <b>n (%) (95% CI for %)</b> |
| Bone                                                                      | 41 (85.4) (72.8 – 92.8)     |
| Nodal (excluding axillary)                                                | 15 (31.3) (19.9 – 45.3)     |
| Pleuropulmonary                                                           | 12 (25.0) (14.9 – 38.8)     |
| Peritoneal carcinomatosis                                                 | 10 (20.8) (11.7 – 34.3)     |
| Brain                                                                     | 10 (20.8) (11.7 – 34.3)     |
| Meninges                                                                  | 3 (6.3) (2.1 – 16.8)        |
| Spleen                                                                    | 3 (6.3) (2.1 – 16.8)        |
| Contralateral breast                                                      | 2 (4.2) (1.2 – 14.0)        |
| Adrenal gland                                                             | 2 (4.2) (1.2 – 14.0)        |
| Orbit                                                                     | 1 (2.1) (0.4 – 10.9)        |
| Ovary                                                                     | 1 (2.1) (0.4 – 10.9)        |

\* Treatments administered until the development of liver contour abnormalities

SD = standard deviation

## Supplementary File

N = number of patients analyzed

n = number of patients in the category

95% CI= 95% confidence interval

---

## Supplementary File

**Table S-4: Most common radiological terms used to describe liver contour abnormalities (N=48)**

| <b>Term</b>                  | <b>n (%) (95% CI for %)</b> |
|------------------------------|-----------------------------|
| Bulge/Dented                 | 39 (81.3) (68.1 – 89.8)     |
| Irregular                    | 36 (75.0) (61.2 – 85.1)     |
| Dysmorphic                   | 27 (56.3) (42.3 – 69.3)     |
| Cirrhosis/cirrhotic          | 16 (33.3) (21.7 – 47.5)     |
| Lobular                      | 15 (31.3) (19.9 – 45.3)     |
| Atrophic                     | 9 (18.8) (10.2 – 31.9)      |
| Nodular                      | 5 (10.4) (4.5 – 22.2)       |
| Hepar lobatum carcinomatosum | 4 (8.3) (3.3 – 19.6)        |
| Pseudocirrhosis              | 2 (4.2) (1.2 – 14.0)        |

n = number of patients in the category

N = number of patients analyzed

95% CI= 95% confidence interval
